## Correction: Upregulation of microRNA-125b by G-CSF promotes metastasis in colorectal cancer

Xinghua Zhang<sup>1,\*</sup>, Xiao Ma<sup>1,\*</sup>, Huaying An<sup>1</sup>, Changqing Xu<sup>2</sup>, Wenjo Cao<sup>3</sup>, Wei Yuan<sup>1,4</sup> and Jie Ma<sup>1,4,5</sup>

<sup>1</sup>State Key Laboratory of Molecular Oncology, National Cancer Center/National Clinical Research Center for Cancer/Cancer Hospital, Chinese Academy of Medical Sciences and Peking Union Medical College, Beijing, China

<sup>2</sup>Department of Gastroenterology, Shandong Provincial Qianfoshan Hospital, Shandong University, Jinan, China

<sup>3</sup>Department of Science, University of British Columbia, Vancouver, Canada

<sup>4</sup>Clinical Immunology Center, Chinese Academy of Medical Science, Beijing, China

<sup>5</sup>Department of Biotherapy, Beijing Hospital, National Center of Gerontology, Beijing, China

\*These authors are contributed equally to this work

**Published:** January 07, 2020

**Copyright:** Zhang et al. This is an open-access article distributed under the terms of the Creative Commons Attribution License 3.0 (CC BY 3.0), which permits unrestricted use, distribution, and reproduction in any medium, provided the original author and source are credited.

**This article has been corrected:** The 1st affiliation information has been updated. The proper affiliation is as follows:

<sup>1</sup>State Key Laboratory of Molecular Oncology, National Cancer Center/National Clinical Research Center for Cancer/Cancer Hospital, Chinese Academy of Medical Sciences and Peking Union Medical College, Beijing, China

Original article: Oncotarget. 2017; 8:50642–50654. <https://doi.org/10.18632/oncotarget.16892>
